1 **The inactivation of enzymes belonging to the central carbon metabolism, a novel**  
2 **mechanism of developing antibiotic resistance**

3

4

5 Teresa Gil-Gil<sup>1</sup>, Fernando Corona<sup>1</sup>, José Luis Martínez\*<sup>1</sup>, Alejandra Bernardini\*<sup>1,2</sup>

6

7 <sup>1</sup> Centro Nacional de Biotecnología. CSIC. 28049-Madrid. Spain

8 <sup>2</sup> Present address: Molecular Oncology Unit, CIEMAT and 12 de Octubre University

9 Hospital, Madrid, Spain

10

11 Running Head: Fosfomycin resistance and carbon metabolism impairment

12

13

14 \* Co-corresponding authors.

15 JLM: [jlmtnez@cnb.csic.es](mailto:jlmtnez@cnb.csic.es)

16 AB: [alebernardini@gmail.com](mailto:alebernardini@gmail.com)

17 **Keywords**

18 Fosfomycin, antibiotic resistance, central carbon metabolism, Embden-Meyerhof-

19 Parnas pathway, *Stenoptophomonas maltophilia*

20

21

## 1 **Abstract**

2 Fosfomycin is a bactericidal antibiotic, analogous to phosphoenolpyruvate (PEP) that  
3 exerts its activity by inhibiting the activity of MurA. This enzyme catalyzes the first  
4 step of peptidoglycan biosynthesis, the transfer of enolpyruvate from PEP to uridine-  
5 diphosphate-N-acetylglucosamine. Fosfomycin is increasingly used in the last years,  
6 mainly for treating infections caused by Gram-negative multidrug resistant bacteria as  
7 *Stenotrophomonas maltophilia*, an opportunistic pathogen characterized by its low  
8 susceptibility to antibiotics of common use. The mechanisms of mutational resistance to  
9 fosfomycin in *S. maltophilia* were studied in the current work. None of the mechanisms  
10 so far described for other organisms, which include the production of fosfomycin  
11 inactivating enzymes, target modification, induction of alternative peptidoglycan  
12 biosynthesis pathway and the impaired entrance of the antibiotic, are involved in the  
13 acquisition of such resistance by this bacterial species. Rather the unique cause of  
14 resistance in the studied mutants is the mutational inactivation of different enzymes  
15 belonging to the Embden-Meyerhof-Parnas central metabolism pathway. The amount of  
16 intracellular fosfomycin accumulation did not change in any of these mutants showing  
17 that neither the inactivation nor the transport of the  
18 antibiotic were involved. Transcriptomic analysis also showed that the mutants did not  
19 present changes in the expression level of putative alternative peptidoglycan  
20 biosynthesis pathway genes neither any related enzyme. Finally, the mutants did not  
21 present an increased PEP concentration that might compete with fosfomycin for its  
22 binding to MurA. Based on these results, we describe a completely novel mechanism of  
23 antibiotic resistance based on the remodeling of *S. maltophilia* metabolism.

## 24 **Significance**

1 Antibiotic resistance (AR) has been largely considered as a specific bacterial response  
2 to an antibiotic challenge. Indeed, its study has been mainly concentrated in  
3 mechanisms that affect the antibiotics (mutations in transporters, the activity of efflux  
4 pumps and antibiotic modifying enzymes) or their targets (i.e.: target mutations,  
5 protection or bypass). Usually, AR-associated metabolic changes were considered to be  
6 a consequence (fitness costs) and not a cause of AR. Herein, we show that strong  
7 alterations in the bacterial metabolism can also be the cause of AR. In the study here  
8 presented, *Stenotrophomonas maltophilia* acquires fosfomycin resistance through the  
9 inactivation of glycolytic enzymes belonging to the Embden-Meyerhof-Parnas. Besides  
10 resistance to fosfomycin, this inactivation also impairs the bacterial gluconeogenic  
11 pathway. Together with previous work showing that AR can be under metabolic  
12 control, our results provide evidence that AR is intertwined with the bacterial  
13 metabolism.  
14

## 1 **Introduction**

2           Antibiotic resistance can be considered as a chemical problem. To be active, an  
3 antibiotic requires to reach its target at concentrations high enough for inhibiting its  
4 activity. Any process or situation that either reduces the effective concentration of the  
5 antibiotic or the antibiotic-target affinity should lead to antibiotic resistance. In  
6 agreement with this situation, classical, so far described, mechanisms of resistance (1)  
7 include elements that diminish the antibiotic concentration like efflux pumps (2),  
8 antibiotic inactivating enzymes (3) or changes in the antibiotic transporters (4).  
9 Concerning the target, elements that reduce its affinity with the antibiotic include  
10 mutations (5), target protection (6), bypass (7) or replacement (8) and eventually  
11 increased target expression (9). Studies on intrinsic resistome have shown that, in  
12 addition to these classical resistance determinants, the susceptibility to antibiotics of a  
13 bacterial species depends on the activity of several elements encompassing all  
14 functional categories (10-12). However, little is still known about the interplay between  
15 bacterial metabolism and the acquisition of antibiotic resistance (13). In the current  
16 article, we explore this feature analyzing *S. maltophilia* fosfomycin resistant mutants.  
17 Fosfomycin is a phosphonic acid derivative that contains an epoxide and a propyl  
18 group, chemically analogous to phosphoenolpyruvate (PEP), which explains its  
19 mechanism of action (14). The enzyme MurA (UDP-*N*-acetylglucosamine enolpyruvyl  
20 transferase), which catalyzes the first step in peptidoglycan biosynthesis (15), the  
21 transfer of enolpyruvate from PEP to uridine diphospho-*N*-acetylglucosamine, is the  
22 only known fosfomycin target. Fosfomycin binds covalently to a cysteine residue in the  
23 active site of MurA, which renders MurA inactivation. As a consequence of MurA  
24 inactivation, the peptidoglycan precursor monomers accumulate inside the cell,  
25 peptidoglycan cannot be synthesized and this leads to bacterial cell lysis and death (16).

1 Different molecular mechanisms leading to fosfomycin resistance have been  
2 identified (17). Some of them impairing the fosfomycin/MurA interaction. Some allelic  
3 variants of MurA found in pathogens intrinsically resistant to fosfomycin such as  
4 *Mycobacterium tuberculosis*, *Borrelia burgdorferi* or *Chlamydia* sp. (15, 18-20) do not  
5 contain a cysteine in their active site, and therefore they are not fully inhibited by  
6 fosfomycin. In the case of organisms containing a fosfomycin-sensitive MurA allele,  
7 mutations in *murA* can be selected (15, 21, 22) and increased synthesis of MurA also  
8 confers a resistance phenotype (23, 24). Also, the presence of an alternative route of  
9 peptidoglycan synthesis, as it happens in *Pseudomonas putida* and *P. aeruginosa*, may  
10 allow circumvent the activity of fosfomycin by recycling the peptidoglycan without the  
11 need of *de novo* synthesis by the enzyme MurA (7). Concerning mechanism involving a  
12 reduction in the intracellular concentration of the antibiotic, resistance can be achieved  
13 as the consequence of changes in the entrance of fosfomycin inside bacterial cell. The  
14 main cause of this impaired uptake is the selection of mutations in any of the genes  
15 encoding the sugar phosphate transporters GlpT and UhpT, which are the gates for  
16 fosfomycin entrance (25, 26). To note here that expression of these transporters is under  
17 metabolic control, in such a way that situations where the nutritional bacterial status  
18 favors the use of sugar phosphates (as intracellular growth) increase fosfomycin activity  
19 (27, 28). Finally, in other cases, fosfomycin is inactivated by fosfomycin modifying  
20 enzymes as FosA, FosB and FosX. (29-32). All the already known mechanisms of  
21 fosfomycin resistance fit in the classical categories of resistance elements (see above).  
22 However, the results presented in the current article support that none of them are  
23 involved in the acquisition of resistance by *S. maltophilia*. In this bacterial species,  
24 fosfomycin resistance was acquired due to mutations in genes encoding enzymes of the  
25 Embden-Meyerhof-Parnas (EMP) metabolic pathway. It has been suggested that

1 antibiotic resistance can be inter-linked to bacterial metabolism (33, 34). However, with  
2 very few exceptions (35), the mutational inactivation of genes encoding enzymes of the  
3 central carbon metabolism has not been considered to be a significant cause of antibiotic  
4 resistance in bacterial pathogens (34, 35). Our article hence shed light in the crosstalk  
5 between antibiotic resistance and central carbon metabolism in *S. maltophilia*.

## 6 **Results**

### 7 **Selection of *S. maltophilia* fosfomycin resistant mutants and identification of the** 8 **mutations involved.**

9 In order to isolate single-step *S. maltophilia* fosfomycin resistant mutants,  
10 around  $10^8$  bacterial cells were seeded on selection plates containing fosfomycin (1024  
11  $\mu\text{g/ml}$ ). Four single-step fosfomycin resistance mutants, hereafter dubbed FOS1, FOS4,  
12 FOS7 and FOS8, were selected for further studies. The MIC of the mutants to  
13 fosfomycin was determined. In all cases, the MICs of fosfomycin were higher in the  
14 mutants than in the wild-type strain (Table 1).

15 The genomes of these mutants were fully sequenced and compared with that of  
16 the parental wild-type strain D457. Five different mutations were detected. FOS4, FOS7  
17 and FOS8 carried one mutation, while FOS1 harbored two mutations. One of them (in  
18 *rne*, SMD\_RS14705:c.G1464T:p.E488D) was discarded because it was predicted to be  
19 neutral using the Provean predictor (0.41 score). Notably, each mutant contains a  
20 different mutation, but all four were found in genes encoding enzymes of EMP  
21 metabolic pathway, namely *eno*, *gpmA*, *gapA* and *pgk* (Table 2). To further confirm the  
22 presence of each of these mutations in the mutant strains, the corresponding genomic  
23 regions were amplified by PCR and the amplicons were Sanger-sequenced. The  
24 presence of the mutations was confirmed in all cases.

1           Although no other mutations seemed to be the cause of the resistance of the  
2 studied mutants, the wild-type allele of the corresponding mutated gene was introduced  
3 in each mutant strain to get a functional validation of the effect of these mutations in the  
4 susceptibility to fosfomycin of *S. maltophilia*. As shown in Table 1, introduction of the  
5 wild-type forms of such genes fully restores the susceptibility of the analyzed *S.*  
6 *maltophilia* fosfomycin resistant mutants to the level of the wild-type strain. These  
7 results indicate that the fosfomycin resistance of these mutants is solely due to the  
8 mutation of genes encoding enzymes of the EMP metabolic pathway. In addition,  
9 susceptibility to other antibiotics was tested in the fosfomycin resistant mutants. No  
10 significant changes between the wild-type strain and the mutants were observed for any  
11 of the tested antibiotics (Table S1), which strongly suggests that these mutations in  
12 genes coding enzymes of the central metabolism are fosfomycin-specific resistance  
13 mutations.

#### 14 **Model of *S. maltophilia* central metabolism**

15           As a first step for deciphering how the mutations in genes encoding enzymes of  
16 the EMP metabolic pathway may impact *S. maltophilia* physiology, a metabolic map of  
17 the central metabolism, which generate energy and precursors to form biomass (36),  
18 was modeled for *S. maltophilia*. The EMP pathway is the best analyzed glycolytic route.  
19 It is based on the sequential activity of ten individual enzymes. The first five form the  
20 upper glycolysis (Glk, Pgi, Pfk, Alf1, TpiA) in which, using ATP, hexoses are  
21 converted into trioses phosphate; whereas in the lower glycolysis (GapA, Pkg, GpmA,  
22 Eno, PykA), pyruvate is formed from the trioses phosphate, at the same time that  
23 NADH and ATP are generated. The pyruvate obtained is decarboxylated by the action  
24 of pyruvate dehydrogenase complex and enters as acetyl-CoA to the tricarboxylic acids  
25 (TCA) cycle (37). The EMP pathway may also function in a gluconeogenic regime,

1 forming hexoses phosphate from trioses phosphate (38). All enzymes of the EMP  
2 pathway were identified in *S. maltophilia* D457 (Figure 1 and Figure S1). Moreover, the  
3 Entner-Doudoroff (ED) route, another glycolytic pathway that also forms trioses  
4 phosphate from hexoses phosphate, is present as well in *S. maltophilia*. It is important  
5 to notice that two enzymes of the central metabolism of D457, GpmA and Eno, present  
6 isoenzymes capable of carrying out the same chemical reaction. As shown in Figure 1,  
7 all the fosfomycin resistance mutations are located in genes encoding enzymes of the  
8 lower glycolytic pathway.

### 9 **Fosfomycin resistance mutations impair the activity of enzymes of the *S.*** 10 ***maltophilia* central metabolism**

11 To determine whether or not the mutations cause a loss of function of the  
12 encoded proteins, the enzymatic activity of Gap, Pkg, Gpm and Eno was measured in  
13 the mutants and in the wild-type strain. As shown in Figure 2, Gap activity decreased by  
14 93 % in the FOS7 mutant, Pkg activity decreased by 100 % in FOS8, Gpm activity  
15 decreased by 65% in FOS4 and Eno activity decreased by 100 % in FOS1, in relation to  
16 the parental strain. Thus, every mutation causes a loss of function of the encoded gene.

17 To elucidate if the reduced activity of these enzymes in the mutants may  
18 produce a relevant metabolic shift in *S. maltophilia*, the activities of the main  
19 dehydrogenases of the central metabolism of *S. maltophilia* D457, which are indicative  
20 of the general physiological state of the cell, including its redox balance, were  
21 measured. In particular, the activities of the glucose-6P dehydrogenase (Zwf), which  
22 connects the glucose-6P with the ED and pentose phosphate (PP) pathways, and  
23 isocitrate dehydrogenases (Icd NAD<sup>+</sup> and Icd NADP<sup>+</sup>) activity, from the TCA cycle,  
24 were determined. The activity of the enzyme Zwf increased by 1.5 to 2.5-fold in the  
25 four fosfomycin resistant mutants (Figure 3) as compared with the wild-type D457



1 strain, whereas the activities of either Icd NAD<sup>+</sup> or Icd NADP<sup>+</sup> did not change in any of  
2 the studied mutants.

3 **Fosfomycin resistance is not the consequence of a metabolic rearrangement**  
4 **that modifies *S. maltophilia* susceptibility to oxidative stress**

5 It has been proposed that the activity of antibiotics may depend on the bacterial  
6 oxidative response (39). One of the key elements in such response is Zwf, an enzyme  
7 with a critical role in the supply of NADPH, which is a relevant cofactor for  
8 maintaining cellular redox balance (40, 41). We have observed that this enzyme  
9 presented an increased activity in the mutants as compared with the wild-type strain (see  
10 above). To address if this increased activity might be the reason for fosfomycin  
11 resistance, *zwf* was inactivated in the FOS4 and FOS7 mutants and in the D457 wild-  
12 type strain. The inactivation of *zwf* causes a slight increase in MIC levels of fosfomycin  
13 from 192 to 256 µg/ml in D457 wild-type strain, whereas this inactivation does not  
14 change fosfomycin susceptibility in the tested mutants.

15 Besides, the role of the mutations in the response to oxidative stresses was tested  
16 by analyzing the susceptibility of the mutants to H<sub>2</sub>O<sub>2</sub> and menadione. As shown in  
17 Table 3, mutations conferring fosfomycin resistance did not alter the susceptibility of *S.*  
18 *maltophilia* to these compounds, whereas, as expected, *zwf* inactivation causes an  
19 increase in the susceptibility to these oxidative stressors. These results indicate that the  
20 susceptibility to fosfomycin of *S. maltophilia* mutants with defective lower glycolysis  
21 enzymes is a specific phenotype, not due to a change in the oxidative stress response.

22 **The impaired activity of EMP enzymes is associated with *S. maltophilia***  
23 **antibiotic resistance**

24 Our results strongly suggest that the cause of fosfomycin resistance in the  
25 studied mutants is a reduced activity of the enzymes of the lower glycolysis pathway in

1 *S. maltophilia*. However, it is still possible that these enzymes may present  
2 moonlighting activities in this bacterial species besides its metabolic role, which could  
3 be associated with the antibiotic resistance in a metabolic independent manner (42, 43).  
4 This possibility is supported by the fact that, while mutations in these genes are easily  
5 selected in *S. maltophilia*, the information present in the Profiling of the *E. coli*  
6 Chromosome (PEC) database, the Keio library and the Transposon-directed insertion  
7 site sequencing (TraDIS) database (44-46) support that they are highly relevant  
8 (eventually essential) in *E. coli*.

9 To determine if the recovery of the glycolytic activity, independently of a  
10 putative additional activity of the *S. maltophilia* inactivated enzymes, could be on the  
11 basis of the observed antibiotic resistance phenotype, a partial version of the Glucobrick  
12 II, containing the *E. coli* genes *gapA*, *pgk*, *gpmA* and *eno* was introduced in the *S.*  
13 *maltophilia* fosfomycin resistant mutants and in the wild-type strain and the  
14 susceptibility to fosfomycin of these strains was measured. By this approach the  
15 enzymatic activity, here provided by the *E. coli* orthologues of the *S. maltophilia*  
16 inactivated genes, was decoupled from another potential activity of such *S. maltophilia*  
17 proteins. As shown in Figure 4, the expression of the *E. coli* GapA-Pgk-GpmA-Eno  
18 enzymes increased the susceptibility to fosfomycin of all FOS mutants, although the  
19 levels achieved were not the same as those of the wild-type strain. This partial  
20 complementation of the phenotype of resistance strongly supports that the absence of  
21 enzymatic activity of the analyzed EMP enzymes contribute to fosfomycin resistance in  
22 *S. maltophilia*.

23 **Fosfomycin resistance of mutants defective in EMP enzymes is not the**  
24 **consequence of an increased production of phosphoenolpyruvate**

1 Fosfomycin inhibits the action of MurA because it is structurally similar to PEP,  
2 one of the substrates of this enzyme. The EMP enzymes associated with fosfomycin  
3 resistance that are inactivated in the *S. maltophilia* fosfomycin resistant mutants present  
4 reversible activity and belong to a pathway that leads to either PEP biosynthesis or  
5 consumption depending on the metabolic regime. It might be then possible that the  
6 inactivation of such enzymes may change the intracellular PEP concentrations, affecting  
7 the binding of fosfomycin to the active site of MurA through a possible competition  
8 between PEP and fosfomycin, which may render a reduced susceptibility to fosfomycin.  
9 To analyze this possibility, the concentration of PEP was analyzed in the wild-type  
10 D457 strain and in the fosfomycin resistant mutants. In none of the mutants an increase  
11 in the intracellular concentration of PEP was observed, ruling out the hypothesis that the  
12 cause of the reduced susceptibility to fosfomycin of the analyzed mutants is an  
13 increased production of PEP.

14 **Fosfomycin resistance mutations impair the gluconeogenic pathway of *S.***  
15 ***maltophilia*.**

16 The mutations selected in presence of fosfomycin compromise the activity of  
17 relevant enzymes of *S. maltophilia* central metabolism. It is then expected, this would  
18 have relevant physiological consequences. To have a general scope of these  
19 consequences, the growth of *S. maltophilia* mutants and of wild-type parental strain  
20 under different conditions was measured. Just small differences in growth among the  
21 tested strains were observed for bacteria growing in rich LB medium (Figure 5A),  
22 indicating these mutations do not impose a relevant general, non-specific, fitness cost.  
23 In addition, the mutants can grow using glucose, which imposes a glycolytic  
24 metabolism, although in the case of FOS1 and FOS8 at a different rate (Figure 5B).  
25 Nevertheless, the mutants were unable to grow using succinate as the carbon source

1 (Figure 5C). This impaired growth in succinate was not observed when the mutants  
2 were complemented with either the wild-type allele of each of the mutated enzymes or  
3 the *E. coli*-derived Glucobrick II (Figure S2). The blocking of any of the enzymes of the  
4 EMP pathway, between triose phosphate isomerase and pyruvate kinase, breaks the  
5 amphibolic process in two branches. These branches work in opposite directions,  
6 starting either from glucose or from pyruvate to provide energy or biosynthetic  
7 intermediates (47). Since *S. maltophilia* additionally displays the one-direction ED  
8 pathway for glucose catabolism, fosfomycin low susceptibility mutants can grow in  
9 minimal medium with glucose. Nevertheless, succinate as exclusive carbon source does  
10 not support growth of the mutants because gluconeogenesis and consequently synthesis  
11 of hexose phosphates are impaired.

### 12 **Fosfomycin resistant mutants do not present an altered intracellular** 13 **accumulation of fosfomycin**

14 While the primary cause of fosfomycin resistance in *S. maltophilia* is the  
15 inactivation of EMP enzymes, it might be possible that such inactivation impairs the  
16 accumulation of the antibiotic within the cell, which could be due to either a reduced  
17 uptake or to the degradation of the antibiotic. A search of possible fosfomycin  
18 transporters in *S. maltophilia* D457 was carried out using Blast (48) with the sequences  
19 of fosfomycin transporters UhpT and GlpT. This search did not identify any possible  
20 transporter of hexose and triose phosphates in the genome of *S. maltophilia* D457,  
21 orthologous to those known in other microorganisms. Nevertheless, these sugars can  
22 still be internalized by alternative transporters. To address this possibility, the different  
23 strains were grown in SMMM containing either glucose-6P or glycerol-3P as sole  
24 carbon sources. Despite *S. maltophilia* harbors the orthologues of the enzymes required  
25 for the catabolism of glucose-6P and glycerol-3P, none of the strains were able to grow

1 using these sugars as unique carbon sources, conditions at which *E. coli* can grow  
2 (Figure S3). This result suggests that *S. maltophilia* lacks glucose-6P and glycerol-3P  
3 transporters, which are the regular gates for fosfomycin entrance in other pathogens.  
4 Besides, the search of fosfomycin modifying enzymes in *S. maltophilia* D457 genome  
5 did not allow to detect any gene homologous to the fosfomycin resistance proteins  
6 (FosA, FosB, FosX, FomA, FomB and FosC) so far described in the literature.

7         Despite *S. maltophilia* genome does not harbor genes encoding neither the  
8 canonical fosfomycin transporters nor already known fosfomycin inactivating enzymes,  
9 it might still be possible that other (still unknown) elements may contribute to an  
10 impaired accumulation of the antibiotic inside the mutants. To analyze this possibility,  
11 the intracellular accumulation of fosfomycin in the different strains was measured (49)  
12 after one hour of incubation with 2 mg/ml fosfomycin in exponential growth phase  
13 cultures. As a control, *E. coli* K-12 and a deletion mutant on the fosfomycin transporter  
14 UhpT (44), as well as *P. aeruginosa* PA14 and insertion mutants on the fosfomycin  
15 transporter GlpT or the fosfomycin resistance protein FosA (50) were used. As shown  
16 in Figure 6, the amount of intracellular fosfomycin is lower both in *E. coli* and *P.*  
17 *aeruginosa* when their respective fosfomycin transporters (GlpT and UhpT) are  
18 inactivated. Conversely, an increased fosfomycin concentration was observed in the  
19 FosA mutant relative to the parental PA14 strain, which supports the validity of these  
20 assays. Nevertheless, the intracellular concentrations of fosfomycin were similar in the  
21 *S. maltophilia* D457 wild-type strain and in the isogenic fosfomycin resistant mutants.  
22 These results suggest that the resistance to fosfomycin of the FOS mutants is not due to  
23 a reduced intracellular concentration of this antibiotic. Notably, fosfomycin  
24 accumulation in *S. maltophilia* is much lower than that found in *E. coli* or *P.*  
25 *aeruginosa*. Indeed, intracellular fosfomycin concentration in *S. maltophilia* is in the

1 range of that observed for the GlpT-defective *P. aeruginosa* mutant. This low  
2 intracellular concentration, likely associated to the lack of canonical antibiotic  
3 transporters, could be the cause of the intrinsic lower susceptibility of *S. maltophilia*  
4 D457 to fosfomycin compared to *E. coli* K-12 and *P. aeruginosa* PA14 (49, 51, 52).

## 5 **Effects of fosfomycin resistance mutations on the transcriptional profile of *S.*** 6 ***maltophilia***

7 In order to know if the mutation of genes encoding the enzymes of the central  
8 metabolism change the transcriptional profile in a way directly related to fosfomycin  
9 resistance, the transcriptomes of the fosfomycin resistant mutants were compared to that  
10 of the wild-type strain. Changes in the expression levels of just 67 of the 4210 genes  
11 that form the genome of *S. maltophilia* D457 were detected (Table S2). Most changes  
12 were specific for each mutant, indicating that the observed transcriptomic changes were  
13 unlikely associated to the common phenotype of fosfomycin resistance (Figure S4).  
14 Concerning changes that may explain the resistance phenotype is important to note the  
15 absence of relevant transcriptional changes in genes related to cell wall synthesis, such  
16 as the gene encoding the fosfomycin target MurA and SMD\_1053, SMD\_1054,  
17 SMD\_0334, *nagZ* and SMD\_2885, predicted to be involved in the recycling of the  
18 peptidoglycan (Table S3). These results support that an increased expression of either  
19 the fosfomycin target (MurA) or the alternative peptidoglycan recycling pathway is not  
20 the cause of fosfomycin resistance in the analyzed mutants.

## 21 **Discussion**

22 So far described fosfomycin resistance mechanisms can be clustered into three  
23 classical categories of antibiotic resistance acquisition (1): alterations in fosfomycin  
24 transport, antibiotic inactivation and alterations in the target enzyme or peptidoglycan  
25 biosynthesis (17). Herein, using a set of *in vitro* selected mutants, we have shown that

1 none of these already known mechanisms seem to be involved in the acquisition of  
2 mutation-driven fosfomycin resistance by *S. maltophilia*. In this microorganism, the  
3 acquisition of resistance is due to the inactivation of enzymes belonging to the EMP  
4 pathway.

5 Our results indicate that the inactivation of these enzymes does not cause major  
6 changes in the transcriptomes of the mutants that may justify resistance as the  
7 consequence of a collateral effect of the selected mutations on the expression of the  
8 aforementioned fosfomycin resistance mechanisms. Inasmuch, intracellular  
9 accumulation of fosfomycin was similar in the wild-type and the mutant strains, which  
10 support that resistance is neither due to an impaired fosfomycin uptake (25) nor to its  
11 degradation *via* the activity of fosfomycin-inactivating enzymes (29, 53). Also  
12 supporting this result is the fact that the genome of *S. maltophilia* does not encode  
13 homologous of the already known fosfomycin resistance proteins or its transporters  
14 GlpT and UhpT.

15 Other mechanisms leading to fosfomycin resistance are modifications of the  
16 target MurA (21) or changes in its expression level. Nevertheless, when the mutants  
17 were sequenced, no mutations in *murA* were found and the analysis of the  
18 transcriptomes indicates that *murA* is not expressed at higher levels in the resistant  
19 mutants than in the wild-type strain. Same happens with the pathway involved in the  
20 recycling of peptidoglycan, which increased expression may contribute to fosfomycin  
21 resistance (7). The expression of the genes encoding the enzymes of this pathway is not  
22 higher in the mutants than in the wild-type strains as shown in the transcriptomic  
23 studies.

24 Therefore, classical antibiotic resistance mechanisms (1, 54) do not seem to be  
25 the cause of fosfomycin resistance in *S. maltophilia*. Although, as above stated, there are

1 not relevant transcriptional changes in the mutants, these strains appear to show a  
2 different physiological state than the wild-type strain, as evidenced by the fact that they  
3 exhibit increased Zwf activity together with the loss of function of the mutated  
4 enzymes. These changes do not modify the response to oxidative stress, an element that  
5 could be relevant in the activity of antibiotics (39). However, it is worth mentioning that  
6 the regulation of the metabolic fluxes of carbon metabolism include additional  
7 mechanisms other than transcriptional regulation (55). Among them, allosteric  
8 regulation as well as the activity of posttranscriptional or posttranslational regulators  
9 can change the production levels and activity of different proteins (eventually involved  
10 in the resistance phenotype) without changing their mRNA levels (56).

11 The mutated enzymes belong to the amphibolic metabolic pathway (EMP and  
12 gluconeogenesis) which includes PEP, the natural substrate of MurA. Fosfomycin due  
13 to its structural similarities to PEP binds and inhibits MurA. It might be then possible  
14 that inactivation of such enzymes in the fosfomycin resistant mutants may produce an  
15 increased synthesis of PEP that could outcompete fosfomycin for its binding to MurA.  
16 However, the concentrations of PEP are no higher in the fosfomycin resistant mutants  
17 than in the wild-type strain, which goes against this possibility. Several enzymes from  
18 central metabolism are moonlighting proteins; they display functions unrelated to their  
19 enzymatic activity (42). The complementation of the mutants with *E. coli* enzymes  
20 restored their susceptibility to fosfomycin, which indicates that the impaired activity of  
21 these metabolic enzymes is on the basis of the observed phenotype of fosfomycin  
22 resistance. Nevertheless, a possible function of the *S. maltophilia* enzymes not related to  
23 their known metabolic function cannot be totally discarded.

24 Previous analysis has shown that *E. coli* mutants deficient in the metabolic  
25 enzyme isocitrate dehydrogenase are resistant to nalidixic acid (35). However, little



1 work is still available in the crosstalk between metabolism (and metabolic robustness)  
2 and antibiotic resistance (57, 58), despite the fact that metabolic interventions may  
3 improve the activity of the antibiotics (33, 59-61) and that bacterial metabolism can  
4 constrain the evolution of antibiotic resistance (13). Our results highlight the importance  
5 that the modification of the activity of enzymes belonging to central metabolism may  
6 have in the susceptibility to antibiotics, as fosfomycin, that are not known to interact  
7 with such enzymes. The finding that fosfomycin activity is highly dependent on the  
8 bacterial metabolic status, being more active when bacteria grow intracellularly (27, 28)  
9 or under acidic conditions and anaerobiosis in urine (62), further support that antibiotic  
10 activity and, consequently antibiotic resistance, are interlinked with the bacterial  
11 metabolism.

## 12 **Material and methods**

### 13 **Bacterial strains and culture conditions.**

14 All bacterial strains, plasmids and oligonucleotides and used in this study are  
15 listed in Tables S4 and S5. Unless otherwise stated, bacteria were grown in LB  
16 (Lysogeny Broth) Lennox medium at 37 °C with constant agitation at 250 rpm. Solid  
17 medium was prepared using an agar concentration of 15 g/l. In order to analyze the  
18 growth of *S. maltophilia* D457 in the presence of a single carbon source, *S. maltophilia*  
19 minimum medium (SMMM) (63) with some modifications was used. The composition  
20 of the medium is described in Supplemental Materials and Methods. When required,  
21 antibiotics were added: 100 µg/ml ampicillin and 50 µg/ml kanamycin for *E. coli*, and  
22 500 µg/ml kanamycin for *S. maltophilia*. Besides, different concentrations of  
23 fosfomycin as well as 1 mM of IPTG were used in different experiments, as stated in  
24 the different sections.

### 25 **Isolation of fosfomycin resistant mutants**

1           Around  $10^8$  *S. maltophilia* D457 bacteria cells were plated on MH agar Petri  
2 dishes containing 1024 µg/ml fosfomicin and were grown at 37 °C during 48 h. The  
3 mutants selected in these conditions were grown on LB agar without antibiotic (three  
4 sequential passages) and then were grown again on MH agar containing 1024 µg/ml  
5 fosfomicin to ensure that the observed phenotype was not transient. The susceptibility  
6 of mutants to fosfomicin was tested (see below), for further studies 4 mutants were  
7 randomly selected and dubbed FOS1, FOS4, FOS7 and FOS8.

### 8 **DNA extraction, whole genome sequencing and SNP identification**

9           Chromosomal DNA from each mutant (FOS1, FOS4, FOS7 and FOS8) and the  
10 wild-type strain (D457) was obtained from overnight cultures using the GNOME DNA  
11 kit (MP Biomedicals). Genomic DNAs were sequenced using the Illumina technology  
12 at the Parque Científico of Madrid, Spain. The samples were subjected to single-end  
13 sequencing with a read-length of 1x150 and a coverage between 26 and 41X was  
14 obtained. The genomic sequences of the strains were compared with *S. maltophilia*  
15 D457 reference genome (NC\_017671.1) and visualized using the software FIESTA 1.1  
16 (<http://bioinfo.gp.cnb.csic.es/tools/FIESTA>). Mutations were filtered according to  
17 sequence quality (>30) and the mutation effect in the protein sequence (moderate and  
18 high effect), and the variants absent in the control D457 parental strain were studied.  
19 Provean predictor ([provean.jcvi.org](http://provean.jcvi.org)) was used to anticipate whether an amino acid  
20 substitution or indel had an impact on the biological function of the coding protein.

21           The presence of the mutations detected from the whole genome sequencing  
22 analysis was confirmed as described in Supplemental Materials and Methods.

### 23 **Antimicrobial susceptibility assays**

1           The minimal inhibitory concentrations (MICs) of gentamicin, tobramycin,  
2 ciprofloxacin, nalidixic acid, ceftazidime, colistin, tetracycline, chloramphenicol and  
3 fosfomycin were determined for each strain on LB agar using MIC test strips (MIC Test  
4 Strips, Liofilchem Diagnostics). For phenotypic the analysis of mutants complemented  
5 with the Glucobrick module II, antibiotic disks (Oxoid) were used. Plates were  
6 incubated at 37 °C and results were analyzed after 20 h. Since commercial fosfomycin  
7 disks contain glucose 6-P, fosfomycin susceptibility assays were also performed, under  
8 the same growing conditions, using paper disks (9 mm, Machery-Nagel) impregnated  
9 with 0.5 mg of fosfomycin. The experiments were performed in triplicate.

#### 10 **Complementation of fosfomycin resistant mutants and generation of *zwf* deletion** 11 **mutants**

12           The genes *eno*, *gpmA*, *pgk* and *gapA*, encoding glycolytic enzymes, were  
13 obtained from the wild-type strain *S. maltophilia* D457 by PCR amplification and  
14 introduced in *S. maltophilia* as described in Supplemental Material and Methods.

15           To complement the mutants with a partial version of the Glucobrick module II,  
16 which contains the genes of the lower glycolysis enzymes of *E. coli* K12, (*gapA*, *pgk*,  
17 *gpmA*, *eno* and *pyk*) (64), the pSEVA224 GBII plasmid containing these genes was  
18 purified with the QIAprep Spin Miniprep kit and digested with restriction enzymes  
19 BamHI and HindIII, obtaining the *gapA-pgk-gpmA-eno* fragment of the Glucobrick  
20 module II. The corresponding band was purified and ligated into pSEVA234 previously  
21 digested with the same enzymes. The new pSEVA234(*gapA-pgk-gpmA-eno*) plasmid  
22 was introduced into the *S. maltophilia* strains D457, FOS1, FOS4, FOS7 and FOS8 by  
23 triple conjugation (65) as described in Supplemental Materials and Methods.

1           The *zwf* gene was deleted in different *S. maltophilia* strains by homologous  
2 recombination as described (66) and detailed in the Supplemental Materials and  
3 Methods section.

#### 4   **RNA extraction and RNA-Seq.**

5           The different bacterial strains were grown overnight in LB broth at 37 °C and  
6 250 rpm. These cultures were used to inoculate new flasks to reach an 0.01 OD<sub>600</sub> and  
7 the cultures were grown at 37 °C until an OD<sub>600</sub> of 0.6 was reached. Afterwards, RNA  
8 was isolated (67) and RNA-Seq was carried out at Sistemas Genómicos S.L., Parque  
9 Tecnológico de Valencia, with Illumina HiSeq 2500 sequencing technology using a 50  
10 bp single-end format as described in Supplemental Materials and Methods.

#### 11   **Bacterial growth measurements**

12           Growth was measured with a *Spark 10M* plate reader (TECAN) at OD<sub>600</sub> in flat-  
13 bottomed transparent 96-well plates (Nunc MicroWell Thermo Fisher). Each well was  
14 inoculated with bacterial suspensions to a final OD<sub>600</sub> of 0.01 in SMMM containing 40  
15 mM of the carbon source under study or LB medium. For SMMM experiments,  
16 overnight cultures were washed twice with SMMM medium without any carbon source.  
17 The plates were incubated at 37 °C with 10 s of shaking every 10 min.

#### 18   **Protein quantification**

19           Protein concentration was determined following the Pierce BCA Protein Assay  
20 Kit (Thermo Scientific) protocol in 96 well plates (Nunc MicroWell Thermo Fisher).

#### 21   ***In vitro* activity assays of the lower glycolysis enzymes and dehydrogenases**

22           Cells were harvested at exponential phase (OD<sub>600</sub> = 0.6) by centrifugation at  
23 5100 xg and 4 °C and washed twice in 0.9% NaCl and 10 mM MgSO<sub>4</sub>. Once washed,

1 cells were disrupted by sonication at 4 °C and the cell extracts were obtained by  
2 centrifugation at 23100 xg for 30 min at 4 °C.

3 NAD(P)<sup>+</sup> reduction or NAD(P)H oxidation was monitored  
4 spectrophotometrically at 340 nm and 25 °C with intermittent shaking in microtiter  
5 plates using *Spark 10M* plate reader (TECAN). Each reaction was performed using  
6 three biological replicates and the specific activities were obtained by dividing the  
7 measured slope of NAD(P)H formation or consumption by the total protein  
8 concentration. Enzymatic activities of dehydrogenases (glucose-6-phosphate, isocitrate  
9 and glyceraldehyde-3P dehydrogenases) were measured as described (68). Enzymatic  
10 activities of phosphoglycerate kinase, phosphoglycerate mutase and enolase were  
11 assayed following the protocol described by Pawluk, A. *et al* (69) with some  
12 modifications in a two-step reaction (see Supplemental Materials and Methods).

### 13 **Quantification of intracellular phosphoenolpyruvate and fosfomycin**

14 The amount of PEP was measured from cultures in exponential growth phase in  
15 LB medium (OD<sub>600</sub> = 0.6). Twenty ml of each culture were centrifuged at 4500 xg for 3  
16 min at 4 °C. *PEP Colorimetric / Fluorometric Assay Kit* protocol (Sigma-Aldrich) was  
17 used with some modifications that are described in Supplemental Materials and  
18 Methods.

19 Assays to test fosfomycin accumulation in bacterial cells were conducted as  
20 previously stated (49), with some modifications that are described in Supplemental  
21 Materials and Methods.

### 22 **H<sub>2</sub>O<sub>2</sub> and menadione susceptibility test**

23 The susceptibility to H<sub>2</sub>O<sub>2</sub> and menadione was tested as described previously  
24 with some modifications (70). Sterile paper disks (9 mm, Machery-Nagel) were

1 impregnated with 10  $\mu$ l of 2.5% H<sub>2</sub>O<sub>2</sub> or 20  $\mu$ l of 0.2 M menadione and placed on LB  
2 agar plates. The diameter of the zone of growth inhibition around each disk was  
3 measured after 20 h of incubation at 37 °C. The experiment was performed in triplicate.

#### 4 **Metabolic map of *S. maltophilia***

5 To model the metabolic map of *S. maltophilia* D457, indicating possible  
6 enzymes of the central metabolism and route bypasses, the BioCyc database (71) was  
7 used. The sequence of the enzymes was obtained from the complete genome of *S.*  
8 *maltophilia* D457 (72). In addition, the amino acid sequence of the enzymes of the  
9 central metabolism of *P. aeruginosa* PAO1 (73) and *E. coli* (74) were aligned using the  
10 Blast tool (48) with the *S. maltophilia* D457 genome confirming the presence or  
11 absence of these enzymes. Moreover, Blast was used to identify possible peptidoglycan  
12 recycling pathway genes, fosfomycin transporters and fosfomycin resistance proteins in  
13 *S. maltophilia* D457.

#### 14 **Acknowledgements**

15 Work in the laboratory is supported by Instituto de Salud Carlos III (grant  
16 RD16/0016/0011) - cofinanced by the European Development Regional Fund “A Way  
17 to Achieve Europe”, by grant S2017/BMD-3691 InGEMICS-CM, funded by  
18 Comunidad de Madrid (Spain) and European Structural and Investment Funds and by  
19 the Spanish Ministry of Economy and Competitiveness (BIO2017-83128-R). TGG is the  
20 recipient of a FPI fellowship from MINECO. The funders had no role in study design,  
21 data collection and interpretation, or the decision to submit the work for publication.

## 1 References

- 2 1. Blair JM, Webber MA, Baylay AJ, Ogbolu DO, Piddock LJ. 2015. Molecular  
3 mechanisms of antibiotic resistance. *Nat Rev Microbiol* 13:42-51.
- 4 2. Hernando-Amado S, Blanco P, Alcalde-Rico M, Corona F, Reales-Calderon JA,  
5 Sanchez MB, Martinez JL. 2016. Multidrug efflux pumps as main players in intrinsic and  
6 acquired resistance to antimicrobials. *Drug Resistance Updates* 28:13-27.
- 7 3. Wright GD. 2005. Bacterial resistance to antibiotics: enzymatic degradation and  
8 modification. *Adv Drug Deliv Rev* 57:1451-70.
- 9 4. Ceccarelli M, Ruggerone P. 2008. Physical insights into permeation of and  
10 resistance to antibiotics in bacteria. *Curr Drug Targets* 9:779-88.
- 11 5. Durão P, Trindade S, Sousa A, Gordo I. 2015. Multiple Resistance at No Cost:  
12 Rifampicin and Streptomycin a Dangerous Liaison in the Spread of Antibiotic  
13 Resistance. *Mol Biol Evol* 32:2675-80.
- 14 6. Tran JH, Jacoby GA, Hooper DC. 2005. Interaction of the plasmid-encoded  
15 quinolone resistance protein Qnr with *Escherichia coli* DNA gyrase. *Antimicrob Agents*  
16 *Chemother* 49:118-25.
- 17 7. Gisin J, Schneider A, Nagele B, Borisova M, Mayer C. 2013. A cell wall recycling  
18 shortcut that bypasses peptidoglycan de novo biosynthesis. *Nat Chem Biol* 9:491-3.
- 19 8. Chambers HF. 1999. Penicillin-binding protein-mediated resistance in  
20 *pneumococci* and *staphylococci*. *J Infect Dis* 179 Suppl 2:S353-9.
- 21 9. Martinez JL, Cercenado E, Rodriguezcreixemas M, Vincenteperez MF,  
22 Delgadoiribarren A, Baquero F. 1987. RESISTANCE TO BETA-LACTAM CLAVULANATE.  
23 *Lancet* 2:1473-1473.
- 24 10. Fajardo A, Martinez-Martin N, Mercadillo M, Galan JC, Ghysels B, Matthijs S,  
25 Cornelis P, Wiehlmann L, Tummler B, Baquero F, Martinez JL. 2008. The neglected  
26 intrinsic resistome of bacterial pathogens. *PLoS ONE* 3:e1619.
- 27 11. Bernardini A, Cuesta T, Tomas A, Bengoechea JA, Martinez JL, Sanchez MB.  
28 2019. The intrinsic resistome of *Klebsiella pneumoniae*. *Int J Antimicrob Agents* 53:29-  
29 33.
- 30 12. Liu A, Tran L, Becket E, Lee K, Chinn L, Park E, Tran K, Miller JH. 2010. Antibiotic  
31 sensitivity profiles determined with an *Escherichia coli* gene knockout collection:  
32 generating an antibiotic bar code. *Antimicrob Agents Chemother* 54:1393-403.
- 33 13. Zampieri M, Enke T, Chubukov V, Ricci V, Piddock L, Sauer U. 2017. Metabolic  
34 constraints on the evolution of antibiotic resistance. *Mol Syst Biol* 13:917.
- 35 14. Hendlin D, Stapley EO, Jackson M, Wallick H, Miller AK, Wolf FJ, Miller TW,  
36 Chaiet L, Kahan FM, Foltz EL, Woodruff HB, Mata JM, Hernandez S, Mochales S. 1969.  
37 Phosphonomycin, a new antibiotic produced by strains of streptomyces. *Science*  
38 166:122-3.
- 39 15. Kahan FM, Kahan JS, Cassidy PJ, Kropp H. 1974. The mechanism of action of  
40 fosfomycin (phosphonomycin). *Ann N Y Acad Sci* 235:364-86.
- 41 16. Skarzynski T, Mistry A, Wonacott A, Hutchinson SE, Kelly VA, Duncan K. 1996.  
42 Structure of UDP-N-acetylglucosamine enolpyruvyl transferase, an enzyme essential  
43 for the synthesis of bacterial peptidoglycan, complexed with substrate UDP-N-  
44 acetylglucosamine and the drug fosfomycin. *Structure* 4:1465-74.
- 45 17. Falagas ME, Vouloumanou EK, Samonis G, Vardakas KZ. 2016. Fosfomycin. *Clin*  
46 *Microbiol Rev* 29:321-47.



- 1 18. McCoy AJ, Sandlin RC, Maurelli AT. 2003. In vitro and in vivo functional activity  
2 of Chlamydia MurA, a UDP-N-acetylglucosamine enolpyruvyl transferase involved in  
3 peptidoglycan synthesis and fosfomycin resistance. *J Bacteriol* 185:1218-28.
- 4 19. De Smet KA, Kempell KE, Gallagher A, Duncan K, Young DB. 1999. Alteration of  
5 a single amino acid residue reverses fosfomycin resistance of recombinant MurA from  
6 *Mycobacterium tuberculosis*. *Microbiology* 145 ( Pt 11):3177-84.
- 7 20. Jiang S, Gilpin ME, Attia M, Ting YL, Berti PJ. 2011. Lyme disease enolpyruvyl-  
8 UDP-GlcNAc synthase: fosfomycin-resistant MurA from *Borrelia burgdorferi*, a  
9 fosfomycin-sensitive mutant, and the catalytic role of the active site Asp. *Biochemistry*  
10 50:2205-12.
- 11 21. Kim DH, Lees WJ, Kempell KE, Lane WS, Duncan K, Walsh CT. 1996.  
12 Characterization of a Cys115 to Asp substitution in the *Escherichia coli* cell wall  
13 biosynthetic enzyme UDP-GlcNAc enolpyruvyl transferase (MurA) that confers  
14 resistance to inactivation by the antibiotic fosfomycin. *Biochemistry* 35:4923-8.
- 15 22. Kumar S, Parvathi A, Hernandez RL, Cadle KM, Varela MF. 2009. Identification  
16 of a novel UDP-N-acetylglucosamine enolpyruvyl transferase (MurA) from *Vibrio*  
17 *fischeri* that confers high fosfomycin resistance in *Escherichia coli*. *Arch Microbiol*  
18 191:425-9.
- 19 23. Venkateswaran PS, Wu HC. 1972. Isolation and characterization of a  
20 phosphomycin-resistant mutant of *Escherichia coli* K-12. *J Bacteriol* 110:935-44.
- 21 24. Couce A, Briales A, Rodriguez-Rojas A, Costas C, Pascual A, Blazquez J. 2012.  
22 Genomewide overexpression screen for fosfomycin resistance in *Escherichia coli*:  
23 MurA confers clinical resistance at low fitness cost. *Antimicrob Agents Chemother*  
24 56:2767-9.
- 25 25. Kadner RJ, Winkler HH. 1973. Isolation and characterization of mutations  
26 affecting the transport of hexose phosphates in *Escherichia coli*. *J Bacteriol* 113:895-  
27 900.
- 28 26. Tsuruoka T, Yamada Y. 1975. Characterization of spontaneous fosfomycin  
29 (phosphomycin)-resistant cells of *Escherichia coli* B in vitro. *J Antibiot (Tokyo)*  
30 28:906-11.
- 31 27. Scotti M, Han L, Alvarez S, Leclercq A, Moura A, Lecuit M, Vazquez-Boland J.  
32 2018. Epistatic control of intrinsic resistance by virulence genes in *Listeria*. *PLoS Genet*  
33 14:e1007525.
- 34 28. Scotti M, Lacharme-Lora L, Wagner M, Chico-Calero I, Losito P, Vazquez-Boland  
35 JA. 2006. Coexpression of virulence and fosfomycin susceptibility in *Listeria*: molecular  
36 basis of an antimicrobial in vitro-in vivo paradox. *Nat Med* 12:515-7.
- 37 29. Rigsby RE, Fillgrove KL, Beihoffer LA, Armstrong RN. 2005. Fosfomycin  
38 resistance proteins: a nexus of glutathione transferases and epoxide hydrolases in a  
39 metalloenzyme superfamily. *Methods Enzymol* 401:367-79.
- 40 30. Etienne J, Gerbaud G, Fleurette J, Courvalin P. 1991. Characterization of  
41 staphylococcal plasmids hybridizing with the fosfomycin resistance gene fosB. *FEMS*  
42 *Microbiol Lett* 68:119-22.
- 43 31. Bernat BA, Laughlin LT, Armstrong RN. 1997. Fosfomycin resistance protein  
44 (FosA) is a manganese metalloglutathione transferase related to glyoxalase I and the  
45 extradiol dioxygenases. *Biochemistry* 36:3050-5.



- 1 32. Fillgrove KL, Pakhomova S, Schaab MR, Newcomer ME, Armstrong RN. 2007.  
2 Structure and mechanism of the genomically encoded fosfomycin resistance protein,  
3 FosX, from *Listeria monocytogenes*. *Biochemistry* 46:8110-20.
- 4 33. Baquero F, Martinez JL. 2017. Interventions on Metabolism: Making Antibiotic-  
5 Susceptible Bacteria. *MBio* 8.
- 6 34. Martinez JL, Rojo F. 2011. Metabolic regulation of antibiotic resistance. *FEMS*  
7 *Microbiol Rev* 35:768-89.
- 8 35. Helling RB, Kukora JS. 1971. Nalidixic acid-resistant mutants of *Escherichia coli*  
9 deficient in isocitrate dehydrogenase. *J Bacteriol* 105:1224-6.
- 10 36. Noor E, Eden E, Milo R, Alon U. 2010. Central carbon metabolism as a minimal  
11 biochemical walk between precursors for biomass and energy. *Mol Cell* 39:809-20.
- 12 37. Bar-Even A, Flamholz A, Noor E, Milo R. 2012. Rethinking glycolysis: on the  
13 biochemical logic of metabolic pathways. *Nat Chem Biol* 8:509-17.
- 14 38. Romano AH, Conway T. 1996. Evolution of carbohydrate metabolic pathways.  
15 *Res Microbiol* 147:448-55.
- 16 39. Kohanski MA, Dwyer DJ, Hayete B, Lawrence CA, Collins JJ. 2007. A common  
17 mechanism of cellular death induced by bactericidal antibiotics. *Cell* 130:797-810.
- 18 40. Sandoval JM, Arenas FA, Vasquez CC. 2011. Glucose-6-phosphate  
19 dehydrogenase protects *Escherichia coli* from tellurite-mediated oxidative stress. *PLoS*  
20 *One* 6:e25573.
- 21 41. Kim J, Jeon CO, Park W. 2008. Dual regulation of *zwf-1* by both 2-keto-3-deoxy-  
22 6-phosphogluconate and oxidative stress in *Pseudomonas putida*. *Microbiology*  
23 154:3905-16.
- 24 42. Henderson B, Martin A. 2011. Bacterial virulence in the moonlight: multitasking  
25 bacterial moonlighting proteins are virulence determinants in infectious disease. *Infect*  
26 *Immun* 79:3476-91.
- 27 43. Katakura Y, Sano R, Hashimoto T, Ninomiya K, Shioya S. 2010. Lactic acid  
28 bacteria display on the cell surface cytosolic proteins that recognize yeast mannan.  
29 *Appl Microbiol Biotechnol* 86:319-26.
- 30 44. Baba T, Ara T, Hasegawa M, Takai Y, Okumura Y, Baba M, Datsenko KA, Tomita  
31 M, Wanner BL, Mori H. 2006. Construction of *Escherichia coli* K-12 in-frame, single-  
32 gene knockout mutants: the Keio collection. *Mol Syst Biol* 2:2006 0008.
- 33 45. Goodall ECA, Robinson A, Johnston IG, Jabbari S, Turner KA, Cunningham AF,  
34 Lund PA, Cole JA, Henderson IR. 2018. The Essential Genome of *Escherichia coli* K-12.  
35 *MBio* 9.
- 36 46. Yamazaki Y, Niki H, Kato J. 2008. Profiling of *Escherichia coli* Chromosome  
37 database. *Methods Mol Biol* 416:385-9.
- 38 47. Irani MH, Maitra PK. 1977. Properties of *Escherichia coli* mutants deficient in  
39 enzymes of glycolysis. *J Bacteriol* 132:398-410.
- 40 48. Altschul SF, Gish W, Miller W, Myers EW, Lipman DJ. 1990. Basic local alignment  
41 search tool. *J Mol Biol* 215:403-10.
- 42 49. Kurabayashi K, Hirakawa Y, Tanimoto K, Tomita H, Hirakawa H. 2014. Role of  
43 the CpxAR two-component signal transduction system in control of fosfomycin  
44 resistance and carbon substrate uptake. *J Bacteriol* 196:248-56.
- 45 50. Liberati NT, Urbach JM, Miyata S, Lee DG, Drenkard E, Wu G, Villanueva J, Wei  
46 T, Ausubel FM. 2006. An ordered, nonredundant library of *Pseudomonas aeruginosa*  
47 strain PA14 transposon insertion mutants. *Proc Natl Acad Sci U S A* 103:2833-8.

- 1 51. Lu CL, Liu CY, Huang YT, Liao CH, Teng LJ, Turnidge JD, Hsueh PR. 2011.  
2 Antimicrobial susceptibilities of commonly encountered bacterial isolates to  
3 fosfomycin determined by agar dilution and disk diffusion methods. *Antimicrob Agents*  
4 *Chemother* 55:4295-301.
- 5 52. Borisova M, Gisin J, Mayer C. 2014. Blocking peptidoglycan recycling in  
6 *Pseudomonas aeruginosa* attenuates intrinsic resistance to fosfomycin. *Microb Drug*  
7 *Resist* 20:231-7.
- 8 53. Fillgrove KL, Pakhomova S, Newcomer ME, Armstrong RN. 2003. Mechanistic  
9 diversity of fosfomycin resistance in pathogenic microorganisms. *J Am Chem Soc*  
10 125:15730-1.
- 11 54. Falagas ME, Athanasaki F, Voulgaris GL, Triarides NA, Vardakas KZ. 2019.  
12 Resistance to fosfomycin: Mechanisms, Frequency and Clinical Consequences. *Int J*  
13 *Antimicrob Agents* 53:22-28.
- 14 55. Sudarsan S, Dethlefsen S, Blank LM, Siemann-Herzberg M, Schmid A. 2014. The  
15 functional structure of central carbon metabolism in *Pseudomonas putida* KT2440.  
16 *Appl Environ Microbiol* 80:5292-303.
- 17 56. Kochanowski K, Sauer U, Noor E. 2015. Posttranslational regulation of microbial  
18 metabolism. *Curr Opin Microbiol* 27:10-7.
- 19 57. Linares JF, Moreno R, Fajardo A, Martinez-Solano L, Escalante R, Rojo F,  
20 Martinez JL. 2010. The global regulator Crc modulates metabolism, susceptibility to  
21 antibiotics and virulence in *Pseudomonas aeruginosa*. *Environ Microbiol* 12:3196-212.
- 22 58. Corona F, Martínez JL, Nikel PI. 2018. The global regulator Crc orchestrates the  
23 metabolic robustness underlying oxidative stress resistance in *Pseudomonas*  
24 *aeruginosa*. *Environmental Microbiology* doi:10.1111/1462-2920.14471.
- 25 59. Brynildsen MP, Winkler JA, Spina CS, Macdonald IC, Collins JJ. 2013.  
26 Potentiating antibacterial activity by predictably enhancing endogenous microbial ROS  
27 production. *Nat Biotechnol* 31:160-5.
- 28 60. Allison KR, Brynildsen MP, Collins JJ. 2011. Metabolite-enabled eradication of  
29 bacterial persisters by aminoglycosides. *Nature* 473:216-20.
- 30 61. Vestergaard M, Nohr-Meldgaard K, Bojer MS, Krogsgaard Nielsen C, Meyer RL,  
31 Slavetinsky C, Peschel A, Ingmer H. 2017. Inhibition of the ATP Synthase Eliminates the  
32 Intrinsic Resistance of *Staphylococcus aureus* towards Polymyxins. *MBio* 8.
- 33 62. Martin-Gutierrez G, Docobo-Perez F, Rodriguez-Beltran J, Rodriguez-Martinez  
34 JM, Aznar J, Pascual A, Blazquez J. 2018. Urinary Tract Conditions Affect Fosfomycin  
35 Activity against *Escherichia coli* Strains Harboring Chromosomal Mutations Involved in  
36 Fosfomycin Uptake. *Antimicrob Agents Chemother* 62.
- 37 63. Boethling RS. 1975. Regulation of extracellular protease secretion in  
38 *Pseudomonas maltophilia*. *J Bacteriol* 123:954-61.
- 39 64. Sanchez-Pascuala A, de Lorenzo V, Nikel PI. 2017. Refactoring the Embden-  
40 Meyerhof-Parnas Pathway as a Whole of Portable GlucoBricks for Implantation of  
41 Glycolytic Modules in Gram-Negative Bacteria. *ACS Synth Biol* 6:793-805.
- 42 65. de Lorenzo V, Timmis KN. 1994. Analysis and construction of stable phenotypes  
43 in gram-negative bacteria with Tn5- and Tn10-derived minitransposons. *Methods*  
44 *Enzymol* 235:386-405.
- 45 66. Blanco P, Corona F, Martinez JL. 2019. Involvement of the RND efflux pump  
46 transporter SmeH in the acquisition of resistance to ceftazidime in *Stenotrophomonas*  
47 *maltophilia*. *Sci Rep* 9:4917.

- 1 67. Corona F, Reales-Calderón JA, Gil C, Martínez JL. 2018. The development of a  
2 new parameter for tracking post-transcriptional regulation allows the detailed map of  
3 the *Pseudomonas aeruginosa* Crc regulon. *Scientific Reports* doi:10.1038/s41598-018-  
4 34741-9.
- 5 68. Fuhrer T, Sauer U. 2009. Different biochemical mechanisms ensure network-  
6 wide balancing of reducing equivalents in microbial metabolism. *J Bacteriol* 191:2112-  
7 21.
- 8 69. Pawluk A, Scopes RK, Griffiths-Smith K. 1986. Isolation and properties of the  
9 glycolytic enzymes from *Zymomonas mobilis*. The five enzymes from glyceraldehyde-3-  
10 phosphate dehydrogenase through to pyruvate kinase. *Biochem J* 238:275-81.
- 11 70. Lin YT, Huang YW, Chen SJ, Chang CW, Yang TC. 2015. The SmeYZ Efflux Pump  
12 of *Stenotrophomonas maltophilia* Contributes to Drug Resistance, Virulence-Related  
13 Characteristics, and Virulence in Mice. *Antimicrob Agents Chemother* 59:4067-73.
- 14 71. Caspi R, Billington R, Ferrer L, Foerster H, Fulcher CA, Keseler IM, Kothari A,  
15 Krummenacker M, Latendresse M, Mueller LA, Ong Q, Paley S, Subhraveti P, Weaver  
16 DS, Karp PD. 2016. The MetaCyc database of metabolic pathways and enzymes and the  
17 BioCyc collection of pathway/genome databases. *Nucleic Acids Res* 44:D471-80.
- 18 72. Lira F, Hernandez A, Belda E, Sanchez MB, Moya A, Silva FJ, Martinez JL. 2012.  
19 Whole-genome sequence of *Stenotrophomonas maltophilia* D457, a clinical isolate and  
20 a model strain. *J Bacteriol* 194:3563-4.
- 21 73. Winsor GL, Griffiths EJ, Lo R, Dhillon BK, Shay JA, Brinkman FS. 2016. Enhanced  
22 annotations and features for comparing thousands of *Pseudomonas* genomes in the  
23 *Pseudomonas* genome database. *Nucleic Acids Res* 44:D646-53.
- 24 74. Welch RA, Burland V, Plunkett G, 3rd, Redford P, Roesch P, Rasko D, Buckles EL,  
25 Liou SR, Boutin A, Hackett J, Stroud D, Mayhew GF, Rose DJ, Zhou S, Schwartz DC,  
26 Perna NT, Mobley HL, Sonnenberg MS, Blattner FR. 2002. Extensive mosaic structure  
27 revealed by the complete genome sequence of uropathogenic *Escherichia coli*. *Proc*  
28 *Natl Acad Sci U S A* 99:17020-4.
- 29
- 30

1 **Table 1. MICs ( $\mu\text{g/ml}$ ) of fosfomycin for the resistant mutants and their**  
2 **corresponding complemented strains**

| Strain      | Plasmid used for complementation |          |                        |                         |                         |                        |
|-------------|----------------------------------|----------|------------------------|-------------------------|-------------------------|------------------------|
|             | None                             | pSEVA234 | pSEVA234<br><i>eno</i> | pSEVA234<br><i>gpmA</i> | pSEVA234<br><i>gapA</i> | pSEVA234<br><i>pgk</i> |
| <b>D457</b> | 192                              | 192      | 128                    | 128                     | 128                     | 192                    |
| <b>FOS1</b> | >1024                            | >1024    | 256                    | ND                      | ND                      | ND                     |
| <b>FOS4</b> | >1024                            | >1024    | ND                     | 256                     | ND                      | ND                     |
| <b>FOS7</b> | >1024                            | >1024    | ND                     | ND                      | 128                     | ND                     |
| <b>FOS8</b> | >1024                            | >1024    | ND                     | ND                      | ND                      | 192                    |

3

4 ND: Not done, each strain was complemented with the wild-type allele of the  
5 corresponding mutated gene.

1 **Table 2. SNPs mapped in the mutants presenting low susceptibility to fosfomicin.**

| Mutant      | Position of the SNP reference sequence | SNP     | Locus       | Gene        | Amino acid change | Product                                  | Old locus tag | Provean Score* |
|-------------|----------------------------------------|---------|-------------|-------------|-------------------|------------------------------------------|---------------|----------------|
| <b>FOS1</b> | 1.829.461                              | A:T>G:C | SMD_RS08765 | <i>eno</i>  | p.D398G           | Enolase                                  | SMD_1655      | -6.77          |
| <b>FOS4</b> | 1.411.119                              | C:G>T:A | SMD_RS06650 | <i>gpmA</i> | p.P212L           | Phosphoglycerate mutase                  | SMD_1268      | -9.88          |
| <b>FOS7</b> | 3.798.418                              | G:C>C:G | SMD_RS17680 | <i>gapA</i> | p.D296G           | Glyceraldehyde-3-phosphate dehydrogenase | SMD_3406      | -3.37          |
| <b>FOS8</b> | 3.793.349                              | G:C>A:T | SMD_RS17665 | <i>pgk</i>  | p.Q50ST           | Phosphoglycerate kinase                  | SMD_3403      |                |

2

3 \*Provean deleterious score threshold of the changes is -2.5.

4 ST: Stop mutation

1

2 **Table 3. Susceptibility to oxidative stress of the analyzed mutants.**

| <b>Strains</b>          | <b>H<sub>2</sub>O<sub>2</sub></b> | <b>Menadione</b> |
|-------------------------|-----------------------------------|------------------|
| <b>D457</b>             | 4.4 ± 0.2                         | 1.9 ± 0.2        |
| <b>FOS1</b>             | 4.5 ± 0.3                         | 1.9 ± 0.3        |
| <b>FOS4</b>             | 4.0 ± 0.3                         | 2.1 ± 0.3        |
| <b>FOS7</b>             | 3.9 ± 0.4                         | 1.5 ± 0.5        |
| <b>FOS8</b>             | 4.1 ± 0.1                         | 2.0 ± 0.8        |
| <b>D457 <i>Δzwf</i></b> | 5.6 ± 0.8                         | 2.6 ± 0.3        |
| <b>FOS4 <i>Δzwf</i></b> | 5.0 ± 0.5                         | 4.9 ± 0.2        |
| <b>FOS7 <i>Δzwf</i></b> | 6.6 ± 0.7                         | 4.7 ± 0.6        |

3

4

1

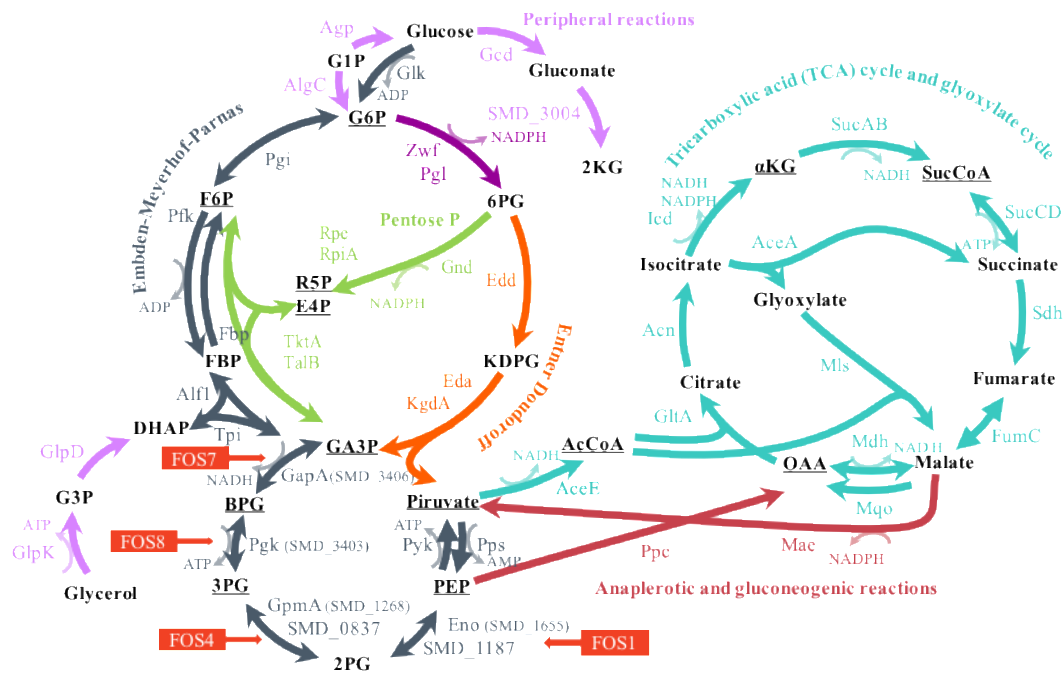

2

3 **Figure 1. Central metabolism of *S. maltophilia* D457.** Schematic representation of the

4 main pathways of the central metabolism: glycolysis (Entner-Doudoroff and Embden-

5 Meyerhof-Parnas), tricarboxylic acid cycle and glyoxylate cycle; pentose phosphate

6 pathway; and anaplerotic and gluconeogenic reactions, as well as peripheral reactions.

7 Underlined are the essential precursors for the biomass formation (36). The mutated

8 enzyme in each FOS mutant is indicated with the name of the corresponding mutant.

9 The name of substrates and products, and the code of the enzymes is shown in

10 Supplemental Material, Figure S1.

11

1

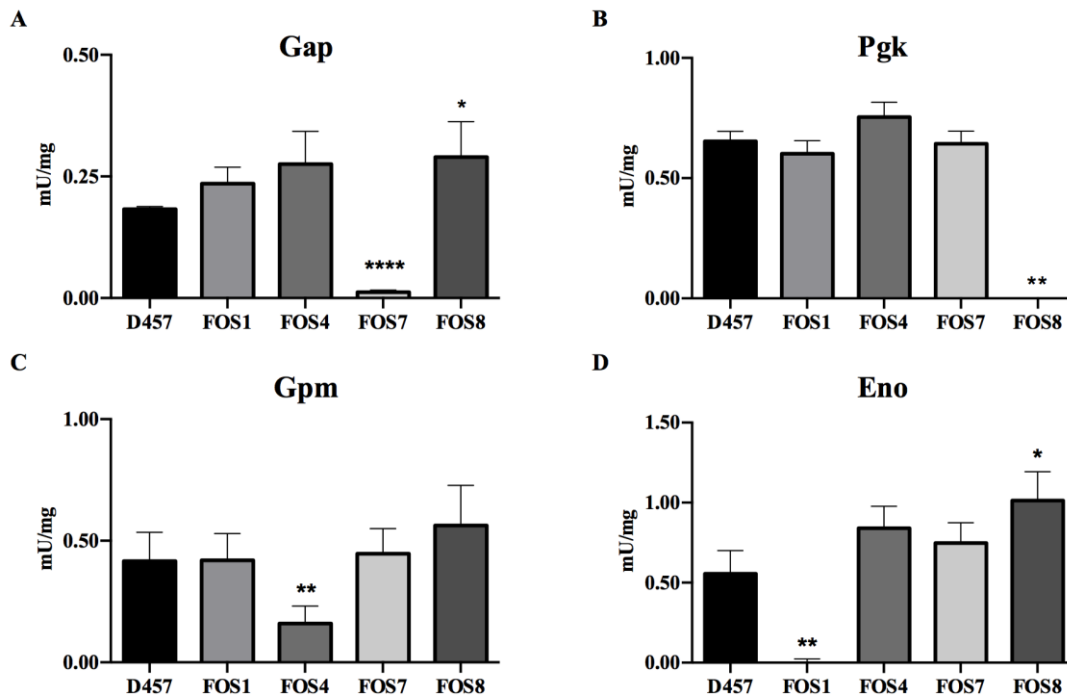

2

3 **Figure 2. Enzymatic activity of the lower glycolysis enzymes in the D457 parental**  
4 **strain and in the fosfomycin resistant mutants. A) Gap** Glyceraldehyde-3P  
5 **dehydrogenase activity. B) Pkg** Phosphoglycerate kinase activity. C) **Gpm**  
6 **Phosphoglycerate mutase activity. D) Eno** Enolase activity. Error bars indicate standard  
7 **deviations of the results from three independent replicates. \* Indicates**  $P < 0.02$ , **\*\***  $P <$   
8 **0.002 and \*\*\*\***  $P < 0.0001$  **calculated by unpaired two tail t-test. As shown, each of the**  
9 **mutants present an impaired activity of the enzyme encoded by the mutated gene.**

10



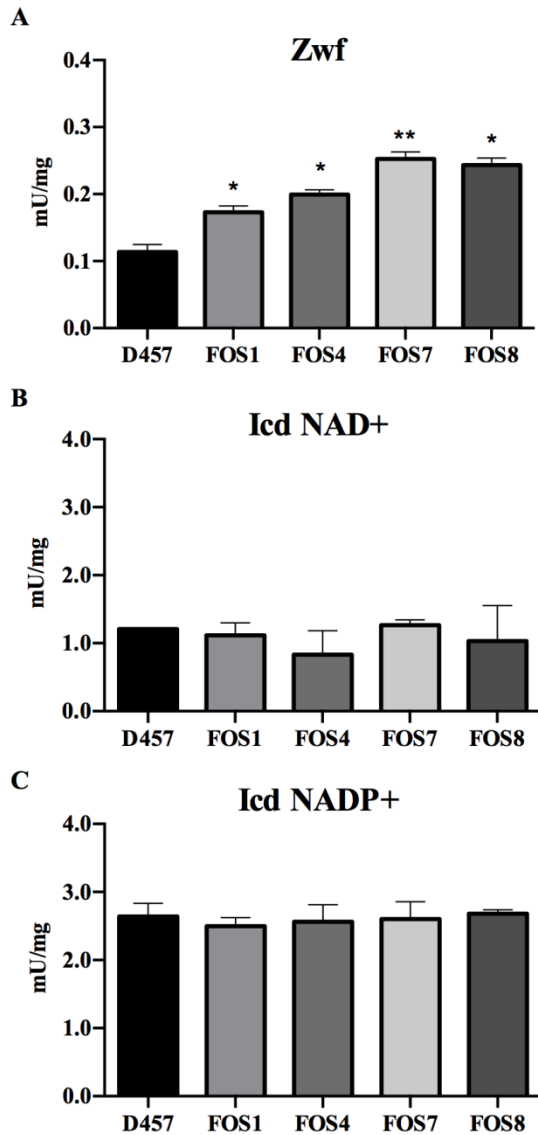

1

2 **Figure 3. Enzymatic activity of dehydrogenases from *S. maltophilia* central**

3 **metabolism of D457 parental strain and fosfomycin resistant mutants A) Zwf**

4 **Glucose-6P dehydrogenase activity. B) Icd (NAD<sup>+</sup>) Isocitrate dehydrogenase NAD<sup>+</sup>**

5 **activity. C) Icd (NADP<sup>+</sup>) Isocitrate dehydrogenase NADP<sup>+</sup> activity. Error bars indicate**

6 **standard deviations of the results from three independent replicates. As shown, the**

7 **activity of Zwf is higher in the fosfomycin resistant mutants. \* Indicates  $P < 0.02$  and**

8 **\*\*  $P < 0.005$  calculated by unpaired two tail t-test.**

9

1

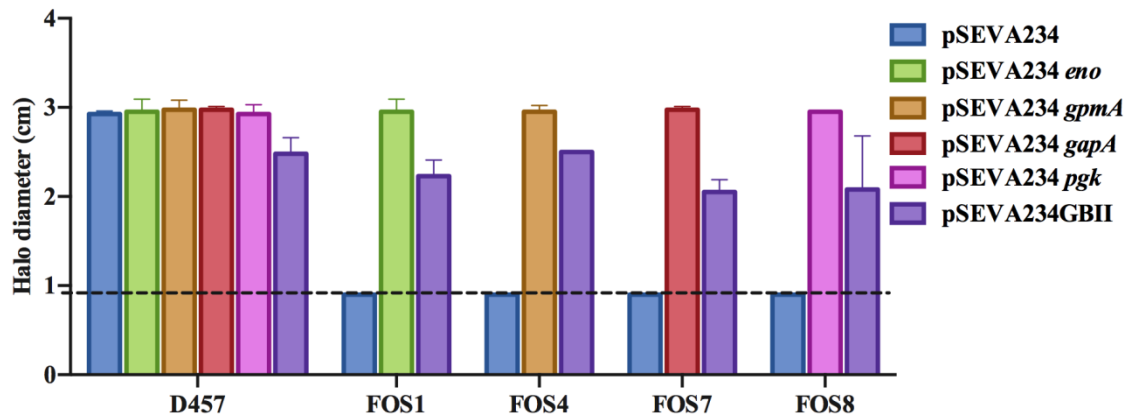

2

3

4 **Figure 4. Fosfomycin susceptibility of the fosfomycin resistant mutants**

5 **complemented with either *S. maltophilia* D457 or *E. coli* K-12 enzymes.** The halo

6 inhibition diameter of fosfomycin disks is shown for the wild-type D457 strain and the

7 four mutants. In all cases, the results are shown for the strains containing either the

8 pSEVA234 backbone used for cloning, the corresponding wild-type alleles of *S.*

9 *maltophilia* genes (*eno*, *gpmA*, *gapA*, *pgk*) or a partial version of Glucobrick II (GBII)

10 with *E. coli* genes *gapA*, *pgk*, *gpmA* and *eno*. Dashed line at 0.9 cm indicates the

11 diameter of the disk. Error bars indicate standard deviations of the results from three

12 independent replicates.

13

1

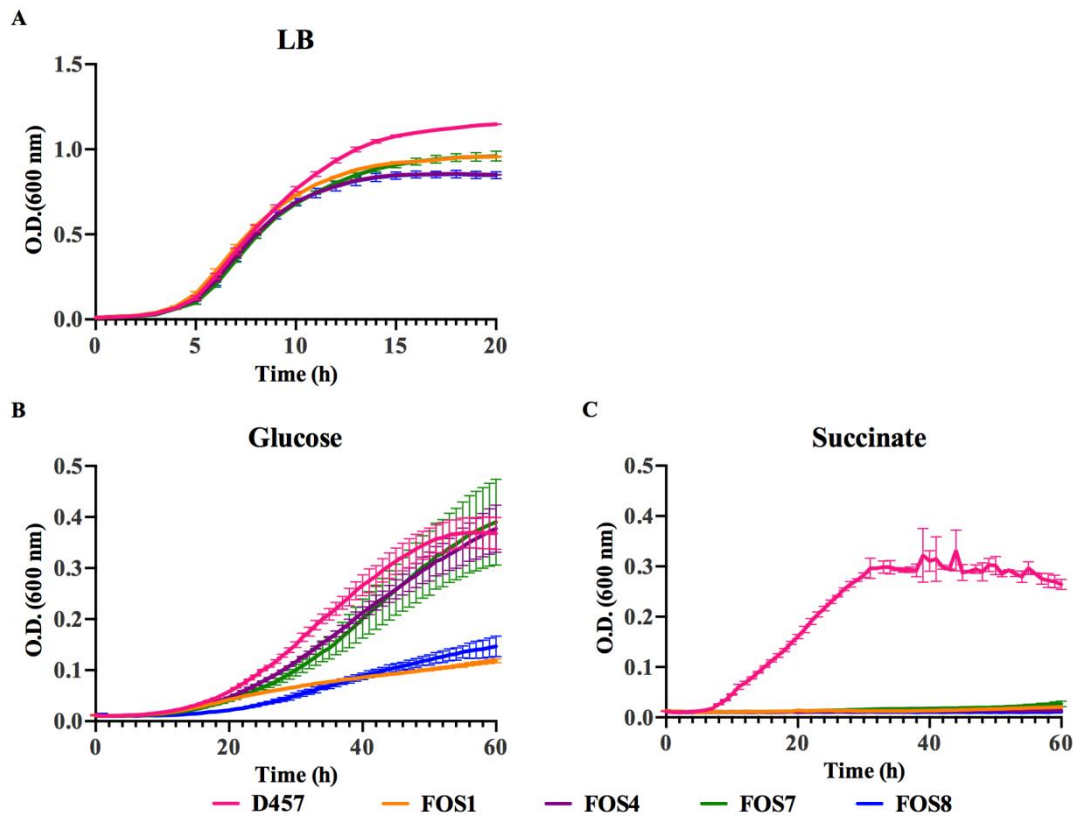

**Figure 5. Effect of fosfomycin resistance mutations in the growth of *S. maltophilia***

**in either LB, glucose or succinate. A) Growth of the different strains in LB. B)**

**Growth in SMMM containing glucose 40 mM. C) Growth in SMMM containing**

**succinate 40 mM. As shown, the fosfomycin resistant mutants are strongly impaired for**

**growing in succinate, whereas the impairment for growing in glucose, particularly of**

**FOS4 and FOS7, was lower. The effect of the mutations in the growth in LB is limited.**

**Error bars indicate standard deviations of the results from three independent replicates.**

10

1

2

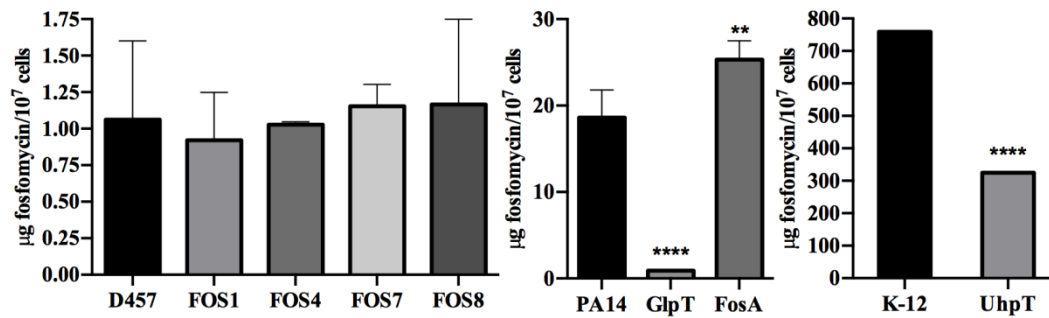

3

4 **Figure 6. The intracellular concentration of fosfomycin does not change in the**

5 **fosfomycin resistant mutants.** Comparison of the fosfomycin intracellular

6 concentration between the mutants and the parental strain. There is not a deficiency in

7 the fosfomycin transport in the mutants that determines its resistance or a fosfomycin

8 modifying enzyme involved in this resistance. PA14 and its mutant GlpT and FosA and

9 *E. coli* K-12 and its mutant UhpT were used as controls of the assay. Error bars indicate

10 standard deviations of the results from three independent replicates. \*\* Indicates  $P <$

11 0.001 and \*\*\*\*  $P < 0.0001$  calculated by unpaired two tail t-test.
